# Supplementary material for: Structural variation and evolution of chloroplast tRNAs in green algae
Source: PeerJ. 2021 Jun 1;9:e11524. doi: 10.7717/peerj.11524 (PMC8176911; doi:10.7717/peerj.11524)
Supplement: Supplemental Information 4 — The tRNA type of the species as well as the length of the tRNA sequence. [file peerj-09-11524-s004.xlsx]

## Sheet: The length of the sequence
The tRNA types of species	length
NC_0156451.trna13-TyrGTA --GTTGCTATCA--CAGGTTCGACCCCTGTCTATCCCA------	81
NC_0083721.trna21-TyrGTA --TTCGCCTACA--CAGGTTCAAATCCTGTTCGGCCCA------	83
NC_0143461.trna4-TyrGTA -TAATATCTACG--CTGGTTCAAATCCAGCTCGGCCCA------	83
NC_0204381.trna27-TyrGTA -TTAG-TCTGCG--TTGGTTCGAATCCGACTCGACCCA------	82
NC_0053531.trna8-TyrGTA -TTAG-TCTGCG--TTGGTTCGAATCCGACTCGACCCA------	82
NC_0110311.trna4-TyrGTA --AATACCTACG--CTGGTTCGAATCCTGCTCGGCCCA------	82
NC_0296711.trna20-TyrGTA --TACGCCTACG--TCAGTTCAAATCTGACTCGACCCA------	82
NC_0296701.trna22-TyrGTA -TTATTCCTACG--TTGGTTCGAATCCGACTCGGCCCA------	83
NC_0285831.trna15-TyrGTA --TATGCCTACG--CTGGTTCGAATCCGGCTCGACCCA------	82
NC_0285841.trna21-TyrGTA --TACGCCTACG--CTGGTTCGAATCCGGCTCGGCCCA------	82
NC_0285861.trna26-TyrGTA --TAATCCTACG--TTGGTTCGAATCCGACTCGACCCA------	82
NC_0081011.trna25-TyrGTA --TACGCCTACG--TTGGTTCGAATCCGACTCGGCCCA------	82
NC_0285871.trna9-TyrGTA --TACGCCTACG--TTGGTTCGAATCCGACTCGGCCCA------	82
NC_0297351.trna16-TyrGTA --TACGCCTACG--TTGGTTCGAATCCGACTCGACCCA------	82
NC_0285831.trna18-LeuTAA -TTACGGTCGTA--AGGGTTCAAGTCCCTTTAGCCCCA------	84
NC_0285841.trna23-LeuTAA -GCAAGCTGGTG--AGGGTTCAAGTCCCTCTATCCCCA------	83
NC_0285871.trna16-LeuTAA -CCAAGTTGGTG--AGGGTTCAAGTCCCTCTATCCCCA------	85
NC_0204381.trna18-LeuTAA -CGAACAAGGTG--AGGGTTCAAGTCCCTCTTTCCCCA------	85
NC_0053531.trna22-LeuTAA -CGAACAAGGTG--AGGGTTCAAGTCCCTCTTTCCCCA------	85
NC_0297351.trna29-LeuTAA -TGAAAATCGTG--AGGGTTCAAGTCCCTCTATCCCCA------	85
NC_0296711.trna2-LeuTAA -TGTCGGTCGTG--AGGGTTCAAGTCCCTCTATCCCCA------	85
NC_0143461.trna20-SerGCT ATTTCCCTACCG--AGGGTTCGAACCCCTCTCTCTCCT------	91
NC_0204381.trna19-SerGCT -TTGCGCTTACG--AGGGTTCGAATCCCTCTCTCTCCG------	90
NC_0053531.trna23-SerGCT -TTGCGCTTACG--AGGGTTCGAATCCCTCTCTCTCCG------	90
NC_0285831.trna12-ArgCCT -ATTCTATGTCG--AGGGTTCAAATCCCTTTCTCTCCGA-----	90
NC_0285831.trna11-SerGCT -AATCTATACCG--AGGGTTCGAATCCCTCTCTCTCCGA-----	90
NC_0110311.trna13-SerGCT -TTTTCGTACCG--AGGGTTCGAATCCCTCTTTCTCCGA-----	90
NC_0083721.trna28-SerGCT -TTTTCGTACCG--AGGGTTCGAATCCCTCTCTCTCCG------	89
NC_0156451.trna10-SerGCT -TTTTTGTACCG--AGGGTTCGAATCCCTCTCTCTCCG------	89
NC_0156451.trna12-SerGCT -TCTTTCTATCG--AGGGTTCAAATCCCTCTCTCTCCG------	89
NC_0285871.trna10-SerGCT -TTTTTGTACCG--AGGGTTCGAATCCCTCTCTCTCCGA-----	89
NC_0296711.trna5-SerGCT -TTTTTGTACCG--AGGGTTCGAATCCCTCTCTCTCCGA-----	89
NC_0296711.trna11-SerGCT -TTTTTGTACCG--AGGGTTCGAATCCCTCTCTCTCCGA-----	89
NC_0297351.trna23-SerGCT -TAACCGTACCG--AGGGTTCGAATCCCTCTCTCTCCGA-----	91
NC_0285841.trna25-SerGCT -TTTTTGTACCG--AGGGTTCGAATCCCTCTCTCTCCGA-----	91
NC_0296701.trna4-SerGCT -TTTTCGTACCG--AGGGTTCGAATCCCTCTCTCTCCGA-----	91
NC_0296701.trna20-SerGCT -TTTTCGTACCG--AGGGTTCGAATCCCTCTCTCTCCGA-----	91
NC_0285861.trna7-SerGCT -TTTTCGTACCG--AGGGTTCGAATCCCTCTCTCTCCGA-----	91
NC_0081011.trna6-SerGCT -CCTTCGTACCG--AGGGTTCGAATCCCTCTCTCTCCGA-----	91
NC_0081011.trna11-SerGCT -CCTTCGTACCG--AGGGTTCGAATCCCTCTCTCTCCGA-----	91
NC_0110311.trna7-SerTGA --TCGGCTACCG--AGGGTTCGAATCCCTCCCTTTCCT------	87
NC_0285841.trna26-SerTGA -TGCGGTCACCG--GGGGTTCGAATCCCTCCCTTTCCG------	87
NC_0285871.trna25-SerTGA -TGCGGTCACCG--GGGGTTCGAATCCCTCCCTTTCCG------	87
NC_0204381.trna8-SerTGA -AGCGGTCACCG--AGGGTTCGAATCCCTCCCTTTCCG------	87
NC_0053531.trna26-SerTGA -CGCGGTCACCG--AGGGTTCGAATCCCTCCCTTTCCG------	87
NC_0285831.trna10-SerTGA -GGAAGTCACCG--TGGGTTCGAATCCCTCCCTTTCCG------	87
NC_0297351.trna12-SerTGA -CGAGGTCATCG--TGGGTTCGAATCCCTCCCTTTCCGA-----	89
NC_0296711.trna22-SerTGA -TATGGTCACCG--AGGGTTCGAATCCCTCCCTTTCCGA-----	88
NC_0296701.trna24-SerTGA -TATGGTCACCG--GGGGTTCGAATCCCTCCCTTTCCGA-----	88
NC_0285861.trna1-SerTGA -TACGGTCACCG--GGGGTTCGAATCCCTCCCTTTCCGA-----	88
NC_0081011.trna28-SerTGA -TACGGTCACCG--GGGGTTCGAATCCCTCCCTTTCCGA-----	88
NC_0156451.trna9-SerTGA -TATGGTCATCG--GGGGTTCGAATCCCTCTCTTTCCGA-----	88
NC_0083721.trna27-SerTGA -CACGGTCATCG--GGGGTTCGACTCCCTCTCTTTCCG------	88
NC_0143461.trna3-SerTGA -TACGGTCACCG--TGGGTTCGAATCCCTCCCTTTCCGA-----	89
NC_0285831.trna25-SerGGA -AAAGCCTACCG--AGGGTTCGAATCCCTCCCTTTCCGA-----	88
NC_0297351.trna19-SerGGA -TTATCTTACCG--AGGGTTCGAATCCCTCTCTTTCCG------	86
NC_0083721.trna16-SerGGA -TC-GGTTACCG--AGGGTTCGAATCCCTCTCTTTCCGA-----	86
NC_0156451.trna14-SerGGA -AT-TGCTACCG--AGGGTTCGAATCCCTCTTTTTCCG------	85
NC_0156451.trna3-LeuCAA -T-TTAGGTGTA--CCGGTTCAAGTCCGGTCAGGGGCA------	82
NC_0083721.trna23-LeuCAA ---AAAAGTGTA--CCGGTTCGAATCCGGTTAAAGGCA------	81
NC_0110311.trna15-LeuCAA ---GCCGGTGTG--TCGGTTCAAATCCGACTGAGGGCA------	81
NC_0110311.trna25-LeuCAA ---GCCGGTGTG--TCGGTTCAAATCCGACTGAGGGCA------	81
NC_0143461.trna21-LeuCAA ---ATAGGCATG--TCGGTTCGAGTCCGACCAGGGGCA------	81
NC_0285831.trna27-LeuTAG -TTACAAGCATG--TCGGTTCGAGTCCGACCGAAGGCA------	84
NC_0083721.trna12-LeuTAG -A-A-AGGCGTG--TCGGTTCGAATCCGACTGGAGGCA------	81
NC_0296701.trna14-LeuTAG -TTT-TTGCGTG--TCGGTTCGAGTCCGACCGAAGGCA------	83
NC_0204381.trna20-LeuTAG -A-A-AGGCGTG--CCGGTTCAAGTCCGGCCGAAGGCA------	82
NC_0297351.trna20-LeuTAG -A-G-AGGCGTG--CCGGTTCAAATCCGGCCGAAGGCA------	82
NC_0285841.trna1-LeuTAG -A-A-AGGCGTG--CCGGTTCAAATCCGGCCGAAGGCA------	82
NC_0053531.trna24-LeuTAG -A-A-AGGCGTG--CCGGTTCAAATCCGGCCGAAGGCA------	82
NC_0285871.trna30-LeuTAG -A-A-AGGCGTG--CCGGTTCAAATCCGGCCGGAGGCA------	82
NC_0296711.trna18-LeuTAG -T-C-GGGCGTA--TCGGTTCGAGTCCGATCGAAGGCA------	82
NC_0285861.trna24-LeuTAG -T-C-GTGCGTG--TCGGTTCGAATCCGACCGAAGGCA------	82
NC_0081011.trna8-LeuTAG -T-T-GTGCGTG--TCGGTTCGAATCCGACCGAAGGCA------	82
NC_0143461.trna22-LeuTAG -A-A-AAGCGTG--TCGGTTCGAATCCGACCGAAGGCA------	82
NC_0110311.trna3-LeuTAG -A-A-AAGCGTG--TCGGTTCGAATCCGACCGAAGGCA------	82
NC_0156451.trna25-LeuTAG -A-A-AGGCGTG--TCGGTTCGAATCCGACCGAAGGCA------	82
NC_0204381.trna17-GluTTC -----GAAAACG--CGGATTCGAATTCCGCTGGGGGTA------	73
NC_0204381.trna24-GluTTC -----GAAAACG--CGGATTCGAATTCCGCTGGGGGTA------	73
NC_0053531.trna3-GluTTC -----GAAAACG--CGGATTCGAATTCCGCTGGGGGTA------	73
NC_0053531.trna21-GluTTC -----GAAAACG--CGGATTCGAATTCCGCTGGGGGTA------	73
NC_0296701.trna8-GluTTC -----GAAAACG--GGGATTCGAATTCCCCTGGGGGTA------	73
NC_0296701.trna13-GluTTC -----GAAAACG--GGGATTCGAATTCCCCTGGGGGTA------	73
NC_0296711.trna9-GluTTC -----GAAAACG--GGGATTCGAATTCCCCTGGGGGTA------	73
NC_0296711.trna17-GluTTC -----GAAAACG--GGGATTCGAATTCCCCTGGGGGTA------	73
NC_0081011.trna7-GluTTC -----GAAAACG--GGGATTCGAATTCCCCTGGGGGTA------	73
NC_0081011.trna17-GluTTC -----GAAAACG--GGGATTCGAATTCCCCTGGGGGTA------	73
NC_0285861.trna16-GluTTC -----GAAAACG--GGGATTCGAATTCCCCTGGGGGTA------	73
NC_0285871.trna3-GluTTC -----GGCGACG--GGGATTCGAATTCCCCTGGGGGTA------	73
NC_0285871.trna12-GluTTC -----GGCGACG--GGGATTCGAATTCCCCTGGGGGTA------	73
NC_0285831.trna7-GluTTC -----AGAAACG--GGGATTCGAATTCCCCTGGGGGTA------	73
NC_0285831.trna17-GluTTC -----AGAAACG--GGGATTCGAATTCCCCTGGGGGTA------	73
NC_0285841.trna10-GluTTC -----GGAAACG--GGGATTCGAATTCCCCTGGGGGTA------	73
NC_0285841.trna22-GluTTC -----GGAAACG--GGGATTCGAATTCCCCTGGGGGTA------	73
NC_0083721.trna1-GluTTC -----GGAAACG--GGGATTCGAATTCCCCTGGGGGTA------	73
NC_0156451.trna16-GluTTC -----GGAAACG--GGGATTCGAATTCCCCTGGGGGTA------	73
NC_0297351.trna18-GluTTC -----GGAAACG--GGGATTCGAATTCCCCTGGGGGTA------	73
NC_0297351.trna28-GluTTC -----GGAAACG--GGGATTCGAATTCCCCTGGGGGTA------	73
NC_0110311.trna23-GluTTC -----GGAAACG--GGGATTCGAATTCCCCTGGGGGTA------	73
NC_0083721.trna18-TrpCCA -----GTACATG--TGAGTTCAATTCTTACAGGGCGTGA-----	72
NC_0296701.trna6-ArgTCT -----TCCAATG--CAGGTTCGATTCCTGCCAGGCTCA------	75
NC_0285831.trna31-ArgTCT -----TCCAACG--TGGGTTCGATTCCCTCTGAGCTCG------	72
NC_0081011.trna13-ArgTCT -----TCCAATG--TAGGTTCGATTCCTACCGAGCTCA------	74
NC_0296711.trna7-ArgTCT -----TCTAATG--TAGGTTCAATTCCTACTGGGTCCG------	72
NC_0297351.trna22-ArgTCT -----TCTAATG--TAGGTTCGATTCCTACTGAGCTCA------	72
NC_0285861.trna13-ArgTCT -----TCTAATG--TAGGTTCGATTCCTACTGAGCTCA------	72
NC_0204381.trna9-ArgTCT -----GTCAATG--TAGGTTCGATTCCTACTGAGCCTGA-----	73
NC_0053531.trna27-ArgTCT -----GTCAATG--TAGGTTCGATTCCTACTGGGCCTGATTACA	78
NC_0285841.trna13-ArgTCT -----GCTAGTG--TAGGTTCAATTCCTACTGGGCTCG------	72
NC_0285871.trna22-ArgTCT -----GTCAGTG--TAGGTTCAATTCCTACTGGGCTCG------	72
NC_0110311.trna18-ArgCCT -----GCTGATA--CGGGTTCGAATCCCATTTGGTCGGA-----	74
NC_0110311.trna28-ArgCCT -----GCTGATA--CGGGTTCGAATCCCATTTGGTCGGA-----	74
NC_0143461.trna7-MetCAT -----ATTTAGG--CGGGTCCGACTCCCGCAGGGTGCA------	72
NC_0285831.trna24-MetCAT -----TCATAGG--CGGGTTCAACTCCTGTATGGTGCA------	73
NC_0083721.trna3-MetCAT -----TTTTAGG--TAGGTTCAACTCCTACAGGGTGCA------	73
NC_0110311.trna6-MetCAT -----TTTTAGG--TGGGTTCAACTCCTACAAGGTGCA------	73
NC_0156451.trna20-MetCAT -----TTTAAGG--TAGGTTCAACTCCTACAAGGTGCA------	73
NC_0081011.trna21-MetCAT -----TTTTAGA--TAGGTTCAACTCCTATACGGTGTA------	73
NC_0296701.trna11-MetCAT -----TATTAGA--TAGGTTCAATTCCTATACGGTGCA------	73
NC_0285861.trna25-MetCAT -----TTTTAGA--TAGGTTCAATTCCTATACGGTGCA------	73
NC_0285871.trna6-MetCAT -----TGATAGG--TAGGTTCAACCCCTACATGGTGCA------	73
NC_0285871.trna13-MetCAT -----TGATAGG--TAGGTTCAACCCCTACATGGTGCA------	73
NC_0297351.trna32-MetCAT -----TTTAAGG--TGGGTTCAACTCCTACACGGTGCA------	73
NC_0285841.trna2-MetCAT -----TTCTAGG--TAGGTTCAACTCCTACACGGTGCA------	73
NC_0204381.trna10-MetCAT -----TACCAGA--TAGGTTCAACTCCTATACGGTGCA------	73
NC_0053531.trna4-MetCAT -----TATAAGG--TAGGTTCAACTCCTATACGGTGCA------	73
NC_0143461.trna9-CysGCA ---------TCC--CCAGTTCGATTCTGGGTGTCG-CCTA----	72
NC_0053531.trna29-CysGCA ---------TCC--CCAGTTCAAATCTGGGTGCCG-CCTA----	71
NC_0285831.trna30-CysGCA ---------TCC--TCAGTTCGATTCTGAGTGTCG-CCTA----	73
NC_0110311.trna8-CysGCA ---------TCC--CCAGTTCGAATCTGGGTGCCG-CCTA----	73
NC_0083721.trna22-CysGCA ---------TCT--CCAGTTCAAATCTGGATGCCG-CCTA----	73
NC_0156451.trna22-CysGCA ---------TCT--CCAGTTCGAATCTGGATGCCG-CCTA----	73
NC_0204381.trna23-CysGCA ---------TCC--CCAGTTCAAATCTGGGTGCCG-CCT-----	72
NC_0285861.trna10-CysGCA ---------TCC--CCAGTTCAAATCCGGGTGCCG-CCT-----	72
NC_0296711.trna6-CysGCA ---------TCC--CCAGTTCAAATCCGGGTGCCG-CCT-----	72
NC_0296701.trna5-CysGCA ---------CCC--TCAGTTCGAATCTGAGTGCCG-CCTA----	73
NC_0081011.trna12-CysGCA ---------TCC--TCAGTTCGAATCTGAGTGCCG-CCT-----	72
NC_0297351.trna26-CysGCA ---------TCC--CCAGTTCGAATCTGGGTGCCG-CCTGA---	74
NC_0285841.trna6-CysGCA ---------TCC--CCAGTTCAAATCTGGGTGCCG-CCT-----	72
NC_0285871.trna26-CysGCA ---------TCC--TCAGTTCAAATCTGAGTGCCG-CCTA----	73
NC_0143461.trna16-HisGTG ---------TCG--CGGGTTCAAGTCCCGTCGTTCGCCT-----	73
NC_0296711.trna24-HisGTG ---------TCG--CGGGTTCGATCCCCGTCGTTCGCCCA----	74
NC_0285831.trna3-HisGTG ---------TCG--CGGGTTCAAGCCCCGTCGTTCGCCA-----	73
NC_0110311.trna19-HisGTG ---------TCG--CGGGTTCGAACCCCGTCGTTCGCCTA----	74
NC_0296701.trna25-HisGTG ---------TCG--CGGGTTCAAATCCCGTCGTTCGCCCA----	74
NC_0285841.trna9-HisGTG ---------TCG--CGGGTTCGAACCCCGTCGTTCGCC------	72
NC_0081011.trna3-HisGTG ---------TCG--CGGGTTCGAACCCCGTCGTTCGCCCA----	74
NC_0083721.trna4-HisGTG ---------TCG--CGGGTTCAAACCCCGTCGTTCGCCGA----	74
NC_0285871.trna29-HisGTG ---------TCG--CGGGTTCAAACCCCGTCGTTCGCCA-----	73
NC_0156451.trna26-HisGTG ---------TCG--CGGGTTCGAACCCCGTCGTTCGCC------	72
NC_0285861.trna4-HisGTG ---------TCG--CGGGTTCGAACCCCGTCGTTCGCCCA----	74
NC_0204381.trna1-HisGTG ---------TCG--CGGGTTCGAACCCCGTCGTTCGCCTA----	74
NC_0053531.trna11-HisGTG ---------TCG--CGGGTTCGAACCCCGTCGTTCGCCTA----	74
NC_0297351.trna7-HisGTG ---------TCG--CGGGTTCGAACCCCGTCGTTCGCCC-----	73
NC_0110311.trna12-GlnTTG ---------TCA--GAGGTTCGAACCCTCTCACCC-CAGA----	73
NC_0083721.trna26-GlnTTG ---------TCG--TAGGTTCGAATCCTTCCGCCC-CAG-----	72
NC_0143461.trna6-GlnTTG ---------TCG--GAGGTTCGAATCCTTCCGTCC-CAG-----	72
NC_0296711.trna19-GlnTTG ---------TCG--CAGGTTCGAATCCTTCCGTCC-CAGA----	73
NC_0081011.trna22-GlnTTG ---------TCG--TAGGTTCGAATCCTTCCGTCC-CAGA----	73
NC_0296701.trna16-GlnTTG ---------TCG--TAGGTTCGAATCCTTCCGCCC-CAG-----	72
NC_0285861.trna20-GlnTTG ---------TCG--CAGGTTCGAATCCTTCCGCCC-CAG-----	72
NC_0156451.trna30-GlnTTG ---------TCG--TAGGTTCGAGTCCTTCCGCCC-CAG-----	72
NC_0285831.trna14-GlnTTG ---------TCG--CTGGTTCGAATCCATCCGCCC-CAGA----	73
NC_0204381.trna28-GlnTTG ---------TCG--CAGGTTCGAATCCTTCCGCCC-CAG-----	72
NC_0053531.trna9-GlnTTG ---------TCG--CAGGTTCGAATCCTTCCGCCC-CAG-----	72
NC_0285871.trna19-GlnTTG ---------TCG--TAGGTTCGAGTCCTTCCGCCC-CAGA----	73
NC_0285841.trna20-GlnTTG ---------TCG--TAGGTTCGAATCCTTCCGCCC-CAGA----	73
NC_0297351.trna4-GlnTTG ---------TCG--TAGGTTCGAGTCCTTCCGCCC-CAGA----	73
NC_0297351.trna17-GlnTTG ---------TCG--TAGGTTCGAGTCCTTCCGCCC-CAGA----	73
NC_0285831.trna2-GlyTCC ---------CTG--CGGGTTCGATCCCCGTCATCCGCTA-----	73
NC_0285831.trna16-LysTTT ---------TTC--TGGGTTCAAGTCCCAGCTAACCCA------	72
NC_0296711.trna23-LysTTT ---------TTC--TAGGTTCGAGTCCTAGTTAACCCA------	72
NC_0083721.trna2-LysTTT ---------CTC--TGGGTTCGAATCCCAGGTAACCCA------	72
NC_0110311.trna5-LysTTT ---------TTC--TGGGTTCGATCCCCAGGTAACCCA------	72
NC_0204381.trna15-LysTTT ---------TTC--TGGGTTCGAGTCCCAGGTAACCCA------	72
NC_0285871.trna17-LysTTT ---------TTC--TGGGTTCGAGTCCCAGGTAACCCA------	72
NC_0053531.trna10-LysTTT ---------TTC--TGGGTTCGAGTCCCAGGTAACCCA------	72
NC_0297351.trna15-LysTTT ---------TTC--TGGGTTCGAGTCCCAGGTAACCCA------	72
NC_0296701.trna26-LysTTT ---------TTC--TAGGTTCGAGTCCTAGGTAACCCA------	72
NC_0285861.trna2-LysTTT ---------TTC--TAGGTTCGAGTCCTAGGTAACCCA------	72
NC_0081011.trna26-LysTTT ---------TTC--TAGGTTCGAGTCCTAGGTAACCCA------	72
NC_0143461.trna10-LysTTT ---------CTC--TGGGTTCGAGTCCCAGGTAACCCA------	72
NC_0285841.trna17-LysTTT ---------TTC--TAGGTTCGAATCCCAGGTAACCCA------	72
NC_0156451.trna17-LysTTT ---------CTC--TGGGTTCGAATCCCAGGTAACCCA------	72
NC_0285831.trna5-AsnGTT ---------TCG--TAGGTTCAATCCCTACCGGGGGAG------	72
NC_0110311.trna21-AsnGTT ---------TCA--TAGGTTCAAATCCTATCTGGAGAGA-----	73
NC_0143461.trna24-AsnGTT ---------TCG--TAGGTTCAAGTCCTACTTGGGGAGA-----	73
NC_0081011.trna2-AsnGTT ---------CCG--TAGGTTCAAGTCCTACCTGGGGAGA-----	73
NC_0285861.trna5-AsnGTT ---------CCG--TAGGTTCAAGTCCTACCTGAGGAG------	72
NC_0083721.trna6-AsnGTT ---------TCG--TAGGTTCAAGTCCTACCTGAGGAGA-----	73
NC_0296701.trna28-AsnGTT ---------TCG--TAGGTTCAAGTCCTACCTGAGGAG------	72
NC_0296711.trna25-AsnGTT ---------TCG--TAGGTTCAAGTCCTACCTGGGGAG------	72
NC_0297351.trna2-AsnGTT ---------TCG--TAGGTTCAAGTCCTACCTGGGGAG------	72
NC_0053531.trna14-AsnGTT ---------TCG--TAGGTTCAAGTCCTACCTGGGAGTTA----	74
NC_0156451.trna28-AsnGTT ---------TCG--TAGGTTCAAGTCCTACCTGGGGAGA-----	73
NC_0285871.trna5-AsnGTT ---------TCG--TAGGTTCAAGTCCTACCTGGGGAGA-----	73
NC_0285841.trna28-AsnGTT ---------TCG--TAGGTTCAAGTCCTACCTGGGGAG------	72
NC_0204381.trna3-AsnGTT ---------TCG--TAGGTTCAAGTCCTACCTGGGGAG------	72
NC_0110311.trna22-ArgTCG ---------TTA--GGGGTTCAATTCC-TCTTAGGTGCA-----	74
NC_0297351.trna13-ArgTCG ---------TTA--GAGGTTCGAGTCC-TCTTAGGTGCA-----	74
NC_0143461.trna13-ArgTCT ---------TCG--GGGGTTCGATTCCCTCCTGAGGCG------	74
NC_0110311.trna11-ArgTCT ---------TCG--TGGGTTCGAATCCCCCCTGAGACA------	74
NC_0083721.trna20-ArgTCT ---------TCG--TGGGTTCGAATCCCTCCTGAGACGA-----	75
NC_0156451.trna18-ArgTCT ---------TCG--GGGGTTCGAATCCCTCCTAGGACG------	74
NC_0110311.trna32-ArgACG ---------TCGATTGGGTTCGAATCCCTCCAGGCCCG------	76
NC_0143461.trna23-ArgACG ---------TCG--GGGGTTCGAATCCCTCCTAGCTCA------	74
NC_0297351.trna14-ArgACG ---------TCG--GGGGTTCGAATCCCTCCTCGCTCA------	74
NC_0083721.trna7-ArgACG ---------CCG--GGGGTTCGAATCCCTCCTTGCTCA------	74
NC_0156451.trna29-ArgACG ---------TCG--GGGGTTCGAATCCCTCCTTGCTCA------	74
NC_0285861.trna17-ArgACG ---------TCG--GGGGTTCGAATCCCTCCTTGCTCA------	74
NC_0081011.trna18-ArgACG ---------TCG--GGGGTTCGAATCCCTCCTTGCTCA------	74
NC_0053531.trna1-ArgACG ---------TCG--GGGGTTCGAAACCCTCCTGGCTCG------	74
NC_0285841.trna5-ArgACG ---------TCG--GGGGTTCGAATCCCTCCTGGCTCG------	74
NC_0204381.trna6-ArgACG ---------TCG--GGGGTTCGAATCCCTCCTGGCTCG------	74
NC_0296711.trna12-ArgACG ---------TCA--GGGGTTCAAATCCCTTCAAGCTCA------	74
NC_0296701.trna9-ArgACG ---------CCG--GGGGTTCGAATCCCTCCAAGCTCA------	74
NC_0285831.trna29-ArgACG ---------TCG--GGGGTTCGAATCCCTCCTCACTCGA-----	75
NC_0285871.trna23-ArgACG ---------TCG--GGGGTTCGAATCCCTCCTAGCTCGA-----	75
NC_0285831.trna26-ProTGG ---------TCG--TAGGTTCGAATCCTATCATTCCGA------	74
NC_0053531.trna2-ProTGG ---------TCG--CAGGTTCGAATCCTGTCATCCCGA------	75
NC_0285871.trna2-ProTGG ---------TCG--CAGGTTCGAATCCTGTCATCCCGA------	74
NC_0285841.trna12-ProTGG ---------TCG--CAGGTTCGAATCCTGTCATCCCGA------	74
NC_0204381.trna7-ProTGG ---------TCG--CAGGTTCGAATCCTGTCATCCCGA------	74
NC_0110311.trna29-ProTGG ---------TCG--CAGGTTCGAATCCTGTCATCCCGA------	74
NC_0083721.trna10-ProTGG ---------TCG--CAGGTTCGAATCCTGTCATCCCGA------	74
NC_0156451.trna8-ProTGG ---------TCG--CAGGTTCGAATCCTGTCATCCCGA------	74
NC_0143461.trna17-ProTGG ---------TCG--CAGGTTCGAATCCTGTCATCCCGA------	74
NC_0296711.trna14-ProTGG ---------TCG--CAGGTTCGAATCCTGTCATCCCTA------	74
NC_0297351.trna31-ProTGG ---------TCG--CAGGTTCGAATCCTGTCATCCCGA------	74
NC_0296701.trna10-ProTGG ---------TCG--CAGGTTCGAATCCTGTCATCCCGA------	74
NC_0081011.trna20-ProTGG ---------TCG--CAGGTTCGAATCCTGTCATCCCGA------	74
NC_0083721.trna13-MetCAT ---------TCG--CAGGTTCGAATCCTGCCCCAGCCA------	74
NC_0156451.trna24-MetCAT ---------TCG--CAGGTTCAAATCCTGCCCCAGCCA------	74
NC_0110311.trna30-MetCAT ---------TCG--CGGGTTCGAATCCTGCCCCAGCACTA----	76
NC_0143461.trna25-MetCAT ---------TCG--CAGGTTCAAATCCTGCCCCAGCAC------	74
NC_0297351.trna6-MetCAT ---------TCG--CAGGTTCAAATCCCGCCTCTGCAA------	74
NC_0285831.trna6-MetCAT ---------TCG--CAGGTTCGAATCCTGCCTCTGCAA------	74
NC_0285841.trna29-MetCAT ---------TCG--CAGGTTCAAATCCTGCCTCTGCAA------	74
NC_0296711.trna26-MetCAT ---------TCG--CAGGTTCAAATCCTGCCTCTGCAA------	74
NC_0285871.trna20-MetCAT ---------TCG--CAGGTTCGAATCCTGCCTCTGCAA------	74
NC_0204381.trna4-MetCAT ---------TCG--CAGGTTCAAATCCTGCCCCTGCCA------	74
NC_0053531.trna12-MetCAT ---------TCG--CAGGTTCAAATCCTGCCCCTGCCA------	74
NC_0296701.trna27-MetCAT ---------TCG--CAGGTTCAAATCCTGCTCCTGCAA------	74
NC_0081011.trna1-MetCAT ---------TCG--CAGGTTCAAATCCTGCTCCTGCAA------	74
NC_0285861.trna6-MetCAT ---------CCG--CAGGTTCAAATCCTGCTCCTGCAA------	74
NC_0285831.trna8-AspGTC ---------TTG--CGGGTTCGAGTCCCGTCAATCCCGA-----	75
NC_0143461.trna8-AspGTC ---------TCG--TGGGTTCGAACCCCATCAGTCCCG------	74
NC_0296701.trna23-AspGTC ---------TTG--CGGGTTCGAGTCCCGTCAGTCCCG------	74
NC_0081011.trna27-AspGTC ---------TTG--CGGGTTCGAGTCCCGTCAGTCCCG------	74
NC_0156451.trna6-AspGTC ---------TTG--CGGGTTCGAGCCCCGTCAGTCCCG------	74
NC_0285871.trna11-AspGTC ---------TTG--CGGGTTCGAGTCCCGTCAATCCCG------	74
NC_0285841.trna16-AspGTC ---------TTG--CGGGTTCGAGTCCCGTCAGTCCCG------	74
NC_0053531.trna20-AspGTC ---------TTG--CGGGTTCGAGTCCCGTCAATCCCGA-----	75
NC_0083721.trna8-AspGTC ---------TTG--CGGGTTCGAGTCCCGTCAATCCCG------	74
NC_0297351.trna27-AspGTC ---------TTG--CGGGTTCGAGTCCCGTCAATCCCGA-----	75
NC_0285861.trna27-AspGTC ---------TTG--CGGGTTCGAGTCCCGTCAATCCCG------	74
NC_0110311.trna2-AspGTC ---------TTG--CGGGTTCGAGTCCCGTCAGTCCCGA-----	75
NC_0204381.trna16-AspGTC ---------TTG--CGGGTTCGAGTCCCGTCAGTCCCGA-----	75
NC_0296711.trna21-AspGTC ---------TTG--CGGGTTCGAGTCCCGTCAGTCCCG------	74
NC_0296701.trna2-IleGAT --------TTCG--CTGGTTCAAGTCCAGCATGGTCCA------	75
NC_0296701.trna18-IleGAT --------TTCG--CTGGTTCAAGTCCAGCATGGTCCA------	75
NC_0285861.trna8-IleGAT ---------TCG--TTGATTCAAGTTCAACATGGTCCACCA---	77
NC_0285861.trna22-IleGAT ---------TCG--TTGATTCAAGTTCAACATGGTCCA------	74
NC_0285841.trna14-IleGAT ---------ACG--GAAGTTCAAATCTTCCATAGCCCACCA---	77
NC_0285841.trna18-IleGAT ---------ACG--GAAGTTCAAATCTTCCATAGCCCA------	74
NC_0110311.trna16-IleGAT ---------TCG--CTGGTTCAAATCCAGTCTAGTCTA------	74
NC_0110311.trna26-IleGAT ---------TCG--CTGGTTCAAATCCAGTCTAGTCTA------	74
NC_0143461.trna18-GlyGCC ---------TCA--CGCGTTCGAGTCGCGCAATCCGCTA-----	73
NC_0204381.trna11-GlyGCC ---------TTG--CGGGTTCGACTCCCGTTGTCCGCTA-----	73
NC_0053531.trna5-GlyGCC ---------TTG--CGGGTTCGACTCCCGTTGTCCGCTA-----	73
NC_0285831.trna23-GlyGCC ---------TCG--CGCGTTCGAGTCGCGTCACTCGCTTA----	74
NC_0285861.trna19-GlyGCC ---------TCG--CGCGTTCGAGTCGCGTTACCCGCT------	73
NC_0296711.trna16-GlyGCC ---------TCG--CGCGTTCGAGTCGCGTTACCCGCTA-----	74
NC_0081011.trna15-GlyGCC ---------TCG--CGCGTTCGAGTCGCGTTACCCGCT------	73
NC_0110311.trna20-GlyGCC ---------TCG--CGCGTTCGAATCGCGTTACCCGCTA-----	73
NC_0297351.trna8-GlyGCC ---------TCG--CGCGTTCGAGCCGCGTTACCCGCTA-----	73
NC_0285841.trna3-GlyGCC ---------TCG--CGCGTTCGAGTCGCGTTACCCGCTA-----	73
NC_0285871.trna21-GlyGCC ---------TCG--CGCGTTCGAGTCGCGTTACCCGCTA-----	73
NC_0156451.trna11-GlyGCC ---------TCG--CGCGTTCGAGTCGCGTTACCCGCTA-----	73
NC_0083721.trna11-GlyGCC ---------TCG--CGCGTTCGAGTCGCGTTACCCGCTA-----	73
NC_0285861.trna18-ProTGG ---------TCG--CAGGTTCGAATCCTGTCATCCCTA------	73
NC_0204381.trna14-GlyTCC ---------TTG--TGGGTTCGAGTCCCATCATCCGCTA-----	74
NC_0053531.trna18-GlyTCC ---------TTG--TGGGTTCGAGTCCCATCATCCGCTA-----	74
NC_0143461.trna5-GlyTCC ---------TCG--TGCGTTCGAATCGCATCATCCGCTA-----	74
NC_0081011.trna24-GlyTCC ---------TCG--CGCGTTCGAATCGCGTTATCCGCTA-----	74
NC_0285871.trna28-GlyTCC ---------TCG--CGCGTTCGAATCGCGTCATCCGCTT-----	74
NC_0285841.trna7-GlyTCC ---------TCG--CGCGTTCGAATCGCGTCATCCGCTA-----	74
NC_0296711.trna10-GlyTCC ---------TCG--CGCGTTCGAATCGCGTCATCCGCTTA----	75
NC_0110311.trna31-GlyTCC ---------TCG--CGCGTTCGAATCGCGTCATCCGCTA-----	74
NC_0083721.trna5-GlyTCC ---------TCG--CGCGTTCGAATCGCGTCATCCGCTA-----	74
NC_0156451.trna27-GlyTCC ---------TCG--CGCGTTCGAATCGCGTCATCCGCTA-----	74
NC_0297351.trna30-GlyTCC ---------TCG--CGCGTTCGAATCGCGTCATCCGCTA-----	74
NC_0296701.trna17-GlyTCC ---------TCG--CGCGTTCGAATCGCGTCATCCGCTA-----	74
NC_0285861.trna21-GlyTCC ---------TCG--CGCGTTCGAATCGCGTCATCCGCT------	73
NC_0083721.trna17-ValTAC ---------TCC--TCGGTTCGAGTCCGGGTGGGCCTA------	73
NC_0143461.trna19-ValTAC ---------TCA--TCGGTTCGAATCCGGTTGGGCCTA------	73
NC_0296701.trna15-ValTAC ---------TCA--TCGGTTCAAATCCGGTTGGGCCTA------	73
NC_0081011.trna19-ValTAC ---------TCA--TCGGTTCAAGTCCGGTTGGGCCTA------	73
NC_0296711.trna13-ValTAC ---------TCA--TCGGTTCGAGTCCGGTTGGGCCTA------	73
NC_0156451.trna19-ValTAC ---------TCA--TCGGTTCGAGTCCGGTTGGGCCTA------	73
NC_0110311.trna10-ValTAC ---------TCA--TCGGTTCGAGTCCGGTTGGGCCTA------	73
NC_0297351.trna3-ValTAC ---------TCA--TCGGTTCGAGTCCGGTTGGGCCTA------	73
NC_0285861.trna15-ValTAC ---------TCA--TCGGTTCGAGTCCGGTTGGGCCTA------	73
NC_0285841.trna11-ValTAC ---------TCA--TCGGTTCAAGTCCGGTTGGGCCTA------	73
NC_0204381.trna5-ValTAC ---------TCA--TCGGTTCAAGTCCGGTTGGGCCTA------	73
NC_0285871.trna1-ValTAC ---------TCA--TCGGTTCAAGTCCGGTTGGGCCTA------	73
NC_0053531.trna15-ValTAC ---------TCA--TCGGTTCAAGTCCGGTTGGGCCTA------	73
NC_0285831.trna28-ValTAC ---------TCA--TCGGTTCGAGTCCGGTTGGGCCTA------	73
NC_0110311.trna17-AlaTGC ---------TCA--TGGGTTCGAATCCCATATTCTCCA------	73
NC_0110311.trna27-AlaTGC ---------TCA--TGGGTTCGAATCCCATATTCTCCA------	73
NC_0081011.trna5-AlaTGC ---------CCA--AGGGTTCGAATCCCTTTATTTCCA------	73
NC_0081011.trna10-AlaTGC ---------CCA--AGGGTTCGAATCCCTTTATTTCCA------	73
NC_0296701.trna3-AlaTGC ---------TCA--GCGGTTCGAATCCGCTTATCTCCA------	73
NC_0296701.trna19-AlaTGC ---------TCA--GCGGTTCGAATCCGCTTATCTCCA------	73
NC_0296711.trna4-AlaTGC ---------TCA--GCGGTTCGACTCCGCTTATCTCCA------	73
NC_0296711.trna29-AlaTGC ---------TCA--GCGGTTCGACTCCGCTTATCTCCA------	73
NC_0143461.trna2-AlaTGC ---------CCA--GCGGTTCGAGTCCGCTTACTTCCACCA---	76
NC_0285861.trna9-AlaTGC ---------TCA--GCGGTTCGAATCCGCTTACTTCCACCA---	76
NC_0285861.trna23-AlaTGC ---------TCA--GCGGTTCGAATCCGCTTACTTCCA------	73
NC_0156451.trna2-AlaTGC ---------CCA--GCGGTTCGAATCCGCTTATCTCCA------	73
NC_0083721.trna15-AlaTGC ---------TCA--GCGGTTCGAATCCGCTTACCTCCA------	73
NC_0204381.trna13-AlaTGC ---------TCA--GCGGTTCGAATCCGCTTATCTCCA------	73
NC_0204381.trna26-AlaTGC ---------TCA--GCGGTTCGAATCCGCTTATCTCCA------	73
NC_0053531.trna7-AlaTGC ---------TCA--GCGGTTCGAATCCGCTTATCTCCACCA---	76
NC_0053531.trna17-AlaTGC ---------TCA--GCGGTTCGAATCCGCTTATCTCCA------	73
NC_0285841.trna15-AlaTGC ---------TCG--CGGGTTCGAACCCTGTCGTTTCCA------	73
NC_0285841.trna19-AlaTGC ---------TCG--CGGGTTCGAACCCTGTCGTTTCCA------	73
NC_0285871.trna8-AlaTGC ---------TCG--CGGGTTCGAAACCTGTCGTATCCACCA---	76
NC_0285871.trna15-AlaTGC ---------TCG--CGGGTTCGAAACCTGTCGTATCCA------	73
NC_0285831.trna20-AlaTGC ---------TCT--GGAGTTCGAATCTCCATGCATCCACCA---	76
NC_0285831.trna22-AlaTGC ---------TCT--GGAGTTCGAATCTCCATGCATCCA------	73
NC_0297351.trna10-AlaTGC ---------TCG--GGGATTCGAGTTCCCCTGCCTCCA------	73
NC_0297351.trna25-AlaTGC ---------TCG--GGGATTCGAGTTCCCCTGCCTCCA------	73
NC_0110311.trna14-TrpCCA ---------TCG--TGGGTTCAAGTCCTACAGGGCGTG------	73
NC_0156451.trna21-TrpCCA ---------TCA--TGGGTTCAAGTCCTATAGGGCGTG------	73
NC_0297351.trna5-TrpCCA ---------TCG--TGGGTTCAAGTCCTACAGGGCGTG------	73
NC_0296701.trna21-TrpCCA ---------TCG--TGGGTTCAAGTCCTACAGGGCGTGA-----	74
NC_0296711.trna15-TrpCCA ---------TCG--TGGGTTCAAGTCCTACAGGGCGTG------	73
NC_0081011.trna16-TrpCCA ---------TCG--TGGGTTCAAGTCCTACAGGGCGTGA-----	74
NC_0143461.trna15-TrpCCA ---------TCG--TGGGTTCAATTCCTACAGGGCGTGA-----	74
NC_0285831.trna1-TrpCCA ---------TCG--TGGGTTCAAGTCCTACAGGGCGTG------	73
NC_0285871.trna27-TrpCCA ---------TCG--TGGGTTCAAGTCCTACAGGGCGTG------	73
NC_0285861.trna11-TrpCCA ---------TCG--TGGGTTCAAGTCCTACAGGGCGTG------	73
NC_0285841.trna8-TrpCCA ---------TCG--TGGGTTCAAGTCCTACAGGGCGTG------	73
NC_0204381.trna21-TrpCCA ---------TCG--TGGGTTCAATTCCTACAGGGCGTG------	73
NC_0053531.trna25-TrpCCA ---------TCG--TGGGTTCAATTCCTACAGGGCGTG------	73
NC_0156451.trna15-ThrGGT ---------TCG--TCGGTTCAAATCCGATAGAAGGCT------	73
NC_0083721.trna19-ThrTGT ---------TCG--TCGGTTCGAGTCCGACAGAAGGCT------	73
NC_0285831.trna9-ThrTGT ---------TTA--TCGGTTCGATTCCGATAGAAGGCTA-----	74
NC_0297351.trna11-ThrTGT ---------TTA--TCGGTTCAACTCCGATAGTAGGCTA-----	73
NC_0285871.trna24-ThrTGT ---------TTA--CCGGTTCAACTCCGGTAGCAGGCTTA----	75
NC_0285861.trna3-ThrTGT ---------TTA--CCGGTTCAACTCCGGTAGAAGGCT------	73
NC_0296711.trna27-ThrTGT ---------TTA--CCGGTTCAACTCCGGTAGTAGGCTA-----	74
NC_0204381.trna22-ThrTGT ---------TTA--TCGGTTCAACTCCGATAGCAAGCTTA----	75
NC_0053531.trna28-ThrTGT ---------TTA--TCGGTTCAACTCCGATAGCAAGCTA-----	74
NC_0081011.trna29-ThrTGT ---------TTA--TCGGTTCAACTCCGATAGTAGGCT------	73
NC_0296701.trna29-ThrTGT ---------TTA--TCGGTTCAACTCCGATAGTAGGCTA-----	74
NC_0143461.trna11-ThrTGT ---------TTA--TCGGTTCAACTCCGATAGTAGGCTA-----	74
NC_0110311.trna24-ThrTGT ---------TTA--TCGGTTCGATTCCGATAGTAGGCTA-----	74
NC_0285841.trna4-ThrTGT ---------TTA--TCGGTTCGACTCCGATAGCAGGCTA-----	74
NC_0156451.trna23-ThrTGT ---------TTA--TCGGTTCGACTCCGATAGCAGGCTA-----	74
NC_0204381.trna2-PheGAA ---------TCA--CCGGTTCAAGTCCGGTTCCTGGCA------	73
NC_0053531.trna13-PheGAA ---------TCA--CCGGTTCAAGTCCGGTTCCTGGCA------	73
NC_0285831.trna4-PheGAA ---------TCA--CCAGTTCAAGTCTGGTTCTTGGCA------	73
NC_0143461.trna14-PheGAA ---------TCA--CCAGTTCAATCCTGGTTCTCGGCA------	72
NC_0110311.trna1-PheGAA ---------TCA--CCAGTTCAATCCTGGTTCCCGGCA------	72
NC_0083721.trna9-PheGAA ---------TCA--CCAGTTCAATCCTGGTTCTCGGCA------	72
NC_0156451.trna7-PheGAA ---------TCA--CCAGTTCAATCCTGGTTCTCGGCA------	72
NC_0296711.trna1-PheGAA ---------TCA--CCAGTTCAAATCTGGTTCTTGGCA------	72
NC_0285861.trna12-PheGAA ---------TCA--CCAGTTCAATCCTGGTCCTTGGCA------	72
NC_0285841.trna27-PheGAA ---------TCA--CCAGTTCAATCCTGGTTCCTGGCA------	72
NC_0285871.trna4-PheGAA ---------TCA--CCAGTTCAATCCTGGTTCCTGGCA------	72
NC_0297351.trna1-PheGAA ---------TCA--CCAGTTCAATCCTGGTTCCTGGCA------	72
NC_0296701.trna12-PheGAA ---------TCA--CCAGTTCAATCCTGGTTCCTGGCA------	72
NC_0081011.trna23-PheGAA ---------TCA--CCAGTTCAATCCTGGTTCCTGGCA------	72
NC_0285831.trna13-MetCAT ---------TCG--TTGGTTCAACTCCGACAATAGGCA------	74
NC_0143461.trna12-MetCAT ---------TCA--CTAGTTCAACTCTAGTAGCAGGCA------	73
NC_0296701.trna7-MetCAT ---------TCA--CTAGTTCGAATCTAGTAGTAGGCA------	74
NC_0081011.trna14-MetCAT ---------TCA--CTAGTTCGAATCTAGTAGCAGGCA------	74
NC_0285841.trna24-MetCAT ---------TCA--CTAGTTCAAATCTAGTAGCAGGCA------	74
NC_0204381.trna29-MetCAT ---------TCA--CTAGTTCAAATCTAGTAGCAGGCA------	74
NC_0053531.trna19-MetCAT ---------TCA--CTAGTTCAAATCTAGTAGCAGGCA------	74
NC_0285871.trna18-MetCAT ---------TCA--CTAGTTCAAATCTAGTAGCAGGCA------	74
NC_0285861.trna14-MetCAT ---------TCA--CTAGTTCAAATCTAGTAGTAGGCA------	74
NC_0297351.trna21-MetCAT ---------TCA--CTAGTTCGAATCTAGTAGCAGGCA------	74
NC_0110311.trna9-MetCAT ---------TCA--CTAGTTCAAATCTAGTAACAGGCA------	74
NC_0156451.trna5-MetCAT ---------TCA--CTAGTTCAAATCTAGTAGCAGGCA------	74
NC_0083721.trna25-MetCAT ---------TCA--CTAGTTCAAGTCTAGTAGTAGGCA------	74
NC_0296711.trna8-MetCAT ---------TCA--CTAGTTCAAATCTAGTAGTAGGCA------	74
NC_0143461.trna1-IleGAT ---------TCA--TAGGTTCAAGTCCTGTATAGCCCACCA---	76
NC_0081011.trna4-IleGAT --------TTCA--CTGGTTCAAGTCCAGTATGGTCCA------	75
NC_0081011.trna9-IleGAT --------TTCA--CTGGTTCAAGTCCAGTATGGTCCA------	75
NC_0204381.trna12-IleGAT ---------TCA--AAAGTTCAAATCTTTTATAGCCCA------	74
NC_0204381.trna25-IleGAT ---------TCA--AAAGTTCAAATCTTTTATAGCCCA------	74
NC_0053531.trna6-IleGAT ---------TCG--AAAGTTCAAATCTTTCATAGCCCA------	74
NC_0053531.trna16-IleGAT ---------TCG--AAAGTTCAAATCTTTCATAGCCCA------	74
NC_0285831.trna19-IleGAT ---------TCA--GAAGTTCAAGTCTTCTATGGCCCA------	74
NC_0285831.trna21-IleGAT ---------TCA--GAAGTTCAAGTCTTCTATGGCCCA------	74
NC_0285871.trna7-IleGAT ---------TCG--GAAGTTCAAATCTTCCATAGCCCA------	74
NC_0285871.trna14-IleGAT ---------TCG--GAAGTTCAAATCTTCCATAGCCCA------	74
NC_0297351.trna9-IleGAT ---------TCG--CTGGTTCAAGTCCAGCATAGCTCA------	73
NC_0297351.trna24-IleGAT ---------TCG--CTGGTTCAAGTCCAGCATAGCTCA------	73
NC_0083721.trna14-IleGAT ---------TCA--CTGGTTCAAGTCCAGTATAGCCCACCA---	77
NC_0156451.trna1-IleGAT ---------TCA--CTGGTTCAAGTCCAGTATAGCCCACCA---	77
NC_0296711.trna3-IleGAT ---------TCA--CAGGTTCAAGTCCCGTATGGCCCACCA---	77
NC_0296711.trna28-IleGAT ---------TCA--CAGGTTCAAGTCCCGTATGGCCCA------	74
