# Supplementary material for: Structural variation and evolution of chloroplast tRNAs in green algae
Source: PeerJ. 2021 Jun 1;9:e11524. doi: 10.7717/peerj.11524 (PMC8176911; doi:10.7717/peerj.11524)
Supplement: Supplemental Information 5 — The specific occurrence of replication events, conditional replication events and loss events for subtypes of tRNA for all species [file peerj-09-11524-s005.xlsx]

## Sheet: Sheet1
Alanine									Arginine
COST: 39.0									COST: 31.5
Duplication L. Bound U. Bound									Duplication L. Bound U. Bound
=================== =================== ====================									=================== =================== ====================
n704730 Chlorophyceae N/A									n564 Chlorophyceae N/A
n704435 Chlorophyceae N/A									n64 Chlorophyceae N/A
n704411 Chlorophyceae N/A									n30 Chlorophyceae N/A
n704397 Chlorophyceae Chlorophyceae									n24 Chlorophyceae N/A
n704395 Chlorophyceae Chlorophyceae									n14 Chlorophyceae N/A
n704389 NC_0053531 Chlamydomonadales									n10 Chlorophyceae N/A
n704394 NC_0204381 Chlamydomonadales									n35 Chlorophyceae N/A
n704400 NC_0296701 Sphaeropleales									n56 Chlorophyceae N/A
n704403 NC_0296711 Sphaeropleales									n60 NC_0110311 Chlorophyceae
n704408 NC_0285861 Sphaeropleales
n704414 NC_0110311 N/A									Duplications: 9
n704418 NC_0081011 Sphaeropleales
n704421 NC_0297351 Sphaeropleales
n704424 NC_0285831 Chlamydomonadales									cD_Node L. Bound U. Bound
n704427 NC_0285841 Chlamydomonadales									=================== =================== ====================
n704430 NC_0285871 Chlamydomonadales									n26 Chlorophyceae N/A
									n18 Chlorophyceae N/A
Duplications: 16									n6 Chlorophyceae N/A
									n23 Chlamydomonadales Chlamydomonadales
									n57 Chlorophyceae N/A
cD_Node L. Bound U. Bound									n37 Chlorophyceae N/A
=================== =================== ====================									n44 Chlamydomonadales Chlamydomonadales
n704415 Chlorophyceae N/A									n53 Sphaeropleales Chlorophyceae
n704405 Chlorophyceae Chlorophyceae									n51 Sphaeropleales Chlorophyceae
n704432 Chlamydomonadales Chlamydomonadales									n49 Sphaeropleales Chlorophyceae
cDNodes: 3									cDNodes: 10
Species No. of Losses									Species No. of Losses
=================== ===================									=================== ===================
NC_0083721 1									Chaetophorales 0
NC_0285861 0									NC_0285861 0
NC_0296711 0									NC_0110311 1
NC_0297351 0									NC_0296711 0
Chlamydomonadales 4									NC_0204381 0
NC_0081011 0									NC_0143461 0
NC_0285871 0									Sphaeropleales 5
NC_0156451 1									NC_0083721 1
NC_0053531 0									Chlorophyceae 5
Chaetophorales 1									NC_0156451 1
NC_0285841 0									NC_0297351 0
NC_0204381 0									NC_0285841 0
Sphaeropleales 4									NC_0081011 0
NC_0110311 0									NC_0053531 0
NC_0296701 0									NC_0296701 0
Chlorophyceae 3									NC_0285871 0
NC_0285831 0									Chlamydomonadales 4
NC_0143461 1									NC_0285831 1
Losses: 15									Losses: 18
Species Duplications cD_Nodes Losses									Species Duplications cD_Nodes Losses
=================== ============== ============== ==============									=================== ============== ============== ==============
NC_0083721 0 0 1									Chaetophorales 0 0 0
NC_0285861 1 0 0									NC_0285861 0 0 0
NC_0296711 1 0 0									NC_0110311 1 0 1
NC_0297351 1 0 0									NC_0296711 0 0 0
Chlamydomonadales 0 1 4									NC_0204381 0 0 0
NC_0081011 1 0 0									NC_0143461 0 0 0
NC_0285871 1 0 0									Sphaeropleales 0 3 5
NC_0156451 0 0 1									NC_0083721 0 0 1
NC_0053531 1 0 0									Chlorophyceae 8 5 5
Chaetophorales 0 0 1									NC_0156451 0 0 1
NC_0285841 1 0 0									NC_0297351 0 0 0
NC_0204381 1 0 0									NC_0285841 0 0 0
Sphaeropleales 0 0 4									NC_0081011 0 0 0
NC_0110311 1 0 0									NC_0053531 0 0 0
NC_0296701 1 0 0									NC_0296701 0 0 0
Chlorophyceae 5 2 3									NC_0285871 0 0 0
NC_0285831 1 0 0									Chlamydomonadales 0 2 4
NC_0143461 0 0 1									NC_0285831 0 0 1
Duplications: 16									Duplications: 9
cDs: 3									cDs: 10
Losses: 15									Losses: 18
Asparagine									Aspartate
COST: 19.0									COST: 20.0
Duplication L. Bound U. Bound									Duplication L. Bound U. Bound
=================== =================== ====================									=================== =================== ====================
n1149 Chlorophyceae N/A									n1552 Chlorophyceae N/A
n986 Chlorophyceae N/A									n1389 Chlorophyceae N/A
n966 Chlorophyceae N/A									n1383 Chlorophyceae N/A
n964 Chlorophyceae N/A									n1373 Chlorophyceae Chlorophyceae
Duplications: 4									Duplications: 4
cD_Node L. Bound U. Bound									cD_Node L. Bound U. Bound
=================== =================== ====================									=================== =================== ====================
n972 Chlorophyceae N/A									n1369 Chlorophyceae Chlorophyceae
n968 Chlorophyceae N/A									n1382 Chlorophyceae N/A
n983 Chlorophyceae Chlorophyceae									n1380 Chlorophyceae N/A
n979 Sphaeropleales Sphaeropleales
									cDNodes: 3
cDNodes: 4
									Species No. of Losses
Species No. of Losses									=================== ===================
=================== ===================									NC_0156451 1
NC_0285841 0									NC_0143461 0
NC_0296711 0									NC_0081011 0
NC_0143461 0									NC_0204381 0
NC_0285861 0									Chaetophorales 0
Chlorophyceae 2									NC_0296711 0
Sphaeropleales 1									NC_0285841 0
NC_0285871 0									Chlamydomonadales 4
NC_0081011 0									NC_0285861 0
NC_0204381 0									NC_0083721 1
NC_0297351 1									Chlorophyceae 4
NC_0285831 0									NC_0053531 0
Chlamydomonadales 5									NC_0285871 0
NC_0053531 0									NC_0285831 0
NC_0156451 1									Sphaeropleales 4
NC_0296701 0									NC_0110311 0
Chaetophorales 2									NC_0297351 0
NC_0110311 0									NC_0296701 0
NC_0083721 1
									Losses: 14
Losses: 13
									Species Duplications cD_Nodes Losses
Species Duplications cD_Nodes Losses									=================== ============== ============== ==============
=================== ============== ============== ==============									NC_0156451 0 0 1
NC_0285841 0 0 0									NC_0143461 0 0 0
NC_0296711 0 0 0									NC_0081011 0 0 0
NC_0143461 0 0 0									NC_0204381 0 0 0
NC_0285861 0 0 0									Chaetophorales 0 0 0
Chlorophyceae 4 3 2									NC_0296711 0 0 0
Sphaeropleales 0 1 1									NC_0285841 0 0 0
NC_0285871 0 0 0									Chlamydomonadales 0 0 4
NC_0081011 0 0 0									NC_0285861 0 0 0
NC_0204381 0 0 0									NC_0083721 0 0 1
NC_0297351 0 0 1									Chlorophyceae 4 3 4
NC_0285831 0 0 0									NC_0053531 0 0 0
Chlamydomonadales 0 0 5									NC_0285871 0 0 0
NC_0053531 0 0 0									NC_0285831 0 0 0
NC_0156451 0 0 1									Sphaeropleales 0 0 4
NC_0296701 0 0 0									NC_0110311 0 0 0
Chaetophorales 0 0 2									NC_0297351 0 0 0
NC_0110311 0 0 0									NC_0296701 0 0 0
NC_0083721 0 0 1
									Duplications: 4
Duplications: 4									cDs: 3
cDs: 4									Losses: 14
Losses: 13
Cysteine									Glutamate
COST: 18.0									COST: 43.0
Duplication L. Bound U. Bound									Duplication L. Bound U. Bound
=================== =================== ====================									=================== =================== ====================
n1961 Chlorophyceae N/A									n410 Chlorophyceae N/A
n1798 Chlorophyceae Chlorophyceae									n151 Chlorophyceae N/A
n1788 Chlorophyceae Chlorophyceae									n119 Sphaeropleales Sphaeropleales
n1786 Chlorophyceae Chlorophyceae									n117 Sphaeropleales Sphaeropleales
									n113 Sphaeropleales Sphaeropleales
Duplications: 4									n126 Chlamydomonadales Chlamydomonadales
									n122 NC_0053531 Chlamydomonadales
									n148 Chlorophyceae N/A
cD_Node L. Bound U. Bound									n130 NC_0285871 Chlamydomonadales
=================== =================== ====================									n147 Chlorophyceae N/A
n1784 Chlorophyceae Chlorophyceae									n133 NC_0285831 Chlamydomonadales
n1780 Chlorophyceae Chlorophyceae									n146 Chlorophyceae N/A
									n142 Chlorophyceae N/A
cDNodes: 2									n138 Chlorophyceae N/A
									Duplications: 14
Species No. of Losses
=================== ===================
NC_0110311 0									cD_Node L. Bound U. Bound
NC_0081011 0									=================== =================== ====================
Sphaeropleales 3									n115 Sphaeropleales Sphaeropleales
NC_0143461 1									n144 Chlorophyceae N/A
NC_0285831 0									n140 Chlorophyceae N/A
NC_0297351 0
Chlamydomonadales 4									cDNodes: 3
NC_0053531 0
NC_0296701 0
NC_0083721 0									Species No. of Losses
NC_0285861 0									=================== ===================
NC_0285841 0									Chlorophyceae 6
Chlorophyceae 4									NC_0285841 0
NC_0296711 0									Chaetophorales 0
NC_0285871 0									NC_0081011 1
NC_0156451 0									NC_0053531 1
NC_0204381 0									NC_0285861 0
Chaetophorales 0									Sphaeropleales 6
									NC_0296701 0
Losses: 12									NC_0285871 0
									Chlamydomonadales 5
									NC_0156451 1
Species Duplications cD_Nodes Losses									NC_0204381 0
=================== ============== ============== ==============									NC_0083721 1
NC_0110311 0 0 0									NC_0110311 1
NC_0081011 0 0 0									NC_0285831 0
Sphaeropleales 0 0 3									NC_0297351 0
NC_0143461 0 0 1									NC_0296711 0
NC_0285831 0 0 0
NC_0297351 0 0 0									Losses: 22
Chlamydomonadales 0 0 4
NC_0053531 0 0 0
NC_0296701 0 0 0									Species Duplications cD_Nodes Losses
NC_0083721 0 0 0									=================== ============== ============== ==============
NC_0285861 0 0 0									Chlorophyceae 7 2 6
NC_0285841 0 0 0									NC_0285841 0 0 0
Chlorophyceae 4 2 4									Chaetophorales 0 0 0
NC_0296711 0 0 0									NC_0081011 0 0 1
NC_0285871 0 0 0									NC_0053531 1 0 1
NC_0156451 0 0 0									NC_0285861 0 0 0
NC_0204381 0 0 0									Sphaeropleales 3 1 6
Chaetophorales 0 0 0									NC_0296701 0 0 0
									NC_0285871 1 0 0
Duplications: 4									Chlamydomonadales 1 0 5
cDs: 2									NC_0156451 0 0 1
Losses: 12									NC_0204381 0 0 0
									NC_0083721 0 0 1
Glutamine									NC_0110311 0 0 1
COST: 26.5									NC_0285831 1 0 0
									NC_0297351 0 0 0
									NC_0296711 0 0 0
Duplication L. Bound U. Bound
=================== =================== ====================									Duplications: 14
n770 Chlorophyceae N/A									cDs: 3
n764 Chlorophyceae Chlorophyceae									Losses: 22
n760 Chlorophyceae Chlorophyceae
n758 Chlorophyceae Chlorophyceae									Glycine
n756 Chlorophyceae Chlorophyceae									COST: 50.5
n750 Chlorophyceae Chlorophyceae
n744 NC_0297351 Sphaeropleales
									Duplication L. Bound U. Bound
Duplications: 7									=================== =================== ====================
									n1556 Chlorophyceae N/A
									n1237 Chlorophyceae N/A
cD_Node L. Bound U. Bound									n1203 Chlorophyceae N/A
=================== =================== ====================									n1201 Chlorophyceae N/A
n945 Chlorophyceae N/A									n1197 Chlorophyceae N/A
n748 Chlorophyceae Chlorophyceae									n1193 Chlorophyceae N/A
n755 Chlamydomonadales Chlamydomonadales									n1235 Chlorophyceae N/A
									n1232 Chlorophyceae N/A
cDNodes: 3									n1228 Chlorophyceae N/A
									n1226 Chlorophyceae N/A
									n1218 Chlorophyceae Chlorophyceae
Species No. of Losses									n1225 Chlorophyceae Chlorophyceae
=================== ===================									n1223 Chlorophyceae Chlorophyceae
NC_0204381 0
Chaetophorales 0									Duplications: 13
NC_0285861 0
Chlorophyceae 6
NC_0285831 0									cD_Node L. Bound U. Bound
NC_0083721 1									=================== =================== ====================
NC_0110311 0									n1205 Chlorophyceae N/A
NC_0081011 0									n1199 Chlorophyceae N/A
NC_0053531 0									n1195 Chlorophyceae N/A
NC_0297351 0									n1189 Sphaeropleales Sphaeropleales
NC_0156451 1									n1210 Chlamydomonadales Chlamydomonadales
NC_0285841 0									n1234 Chlorophyceae N/A
NC_0143461 1									n1230 Chlorophyceae N/A
NC_0296711 0
Sphaeropleales 4									cDNodes: 7
Chlamydomonadales 3
NC_0285871 0
NC_0296701 0									Species No. of Losses
									=================== ===================
Losses: 16									NC_0297351 0
									NC_0110311 0
									NC_0285861 0
Species Duplications cD_Nodes Losses									NC_0143461 0
=================== ============== ============== ==============									NC_0296711 0
NC_0204381 0 0 0									NC_0053531 0
Chaetophorales 0 0 0									NC_0204381 0
NC_0285861 0 0 0									Chlorophyceae 7
Chlorophyceae 6 2 6									NC_0285871 0
NC_0285831 0 0 0									NC_0296701 0
NC_0083721 0 0 1									NC_0081011 0
NC_0110311 0 0 0									Chlamydomonadales 8
NC_0081011 0 0 0									NC_0156451 2
NC_0053531 0 0 0									NC_0285831 0
NC_0297351 1 0 0									NC_0285841 0
NC_0156451 0 0 1									Chaetophorales 3
NC_0285841 0 0 0									Sphaeropleales 9
NC_0143461 0 0 1									NC_0083721 2
NC_0296711 0 0 0
Sphaeropleales 0 0 4									Losses: 31
Chlamydomonadales 0 1 3
NC_0285871 0 0 0
NC_0296701 0 0 0									Species Duplications cD_Nodes Losses
									=================== ============== ============== ==============
Duplications: 7									NC_0297351 0 0 0
cDs: 3									NC_0110311 0 0 0
Losses: 16									NC_0285861 0 0 0
									NC_0143461 0 0 0
Histidine									NC_0296711 0 0 0
COST: 27.0									NC_0053531 0 0 0
									NC_0204381 0 0 0
									Chlorophyceae 13 5 7
Duplication L. Bound U. Bound									NC_0285871 0 0 0
=================== =================== ====================									NC_0296701 0 0 0
n2171 Chlorophyceae N/A									NC_0081011 0 0 0
n2008 Chlorophyceae N/A									Chlamydomonadales 0 1 8
n2002 Chlorophyceae Chlorophyceae									NC_0156451 0 0 2
n2000 Chlorophyceae Chlorophyceae									NC_0285831 0 0 0
n1994 Chlorophyceae Chlorophyceae									NC_0285841 0 0 0
n1992 Chlorophyceae Chlorophyceae									Chaetophorales 0 0 3
									Sphaeropleales 0 1 9
Duplications: 6									NC_0083721 0 0 2
									Duplications: 13
cD_Node L. Bound U. Bound									cDs: 7
=================== =================== ====================									Losses: 31
n1990 Chlorophyceae Chlorophyceae
n1988 Chlorophyceae Chlorophyceae									Isoleucine
n1999 Chlorophyceae Chlorophyceae									COST: 21.0
cDNodes: 3
									Duplication L. Bound U. Bound
									=================== =================== ====================
Species No. of Losses									n2463 Chlorophyceae N/A
=================== ===================									n2417 NC_0296701 Sphaeropleales
NC_0285841 0									n2420 NC_0081011 Sphaeropleales
NC_0296701 0									n2424 NC_0285861 Sphaeropleales
NC_0204381 0									n2428 NC_0296711 Sphaeropleales
NC_0143461 1									n2432 NC_0297351 Sphaeropleales
NC_0297351 0									n2435 NC_0110311 Chlorophyceae
Chlorophyceae 5									n2445 NC_0285831 N/A
NC_0083721 1									n2448 NC_0204381 Chlamydomonadales
Chaetophorales 0									n2451 NC_0053531 Chlamydomonadales
NC_0296711 0									n2455 NC_0285841 Chlamydomonadales
Sphaeropleales 5									n2458 NC_0285871 Chlamydomonadales
NC_0156451 1
NC_0053531 0									Duplications: 12
NC_0285871 0
NC_0285831 0
NC_0285861 0									cD_Node L. Bound U. Bound
Chlamydomonadales 4									=================== =================== ====================
NC_0110311 1									n2758 Chlorophyceae N/A
NC_0081011 0									n2429 Sphaeropleales Sphaeropleales
									n2425 Sphaeropleales Sphaeropleales
Losses: 18									n2442 Chlorophyceae N/A
									n2440 Chlorophyceae N/A
									n2461 Chlamydomonadales N/A
Species Duplications cD_Nodes Losses									n2460 Chlamydomonadales N/A
=================== ============== ============== ==============
NC_0285841 0 0 0									cDNodes: 7
NC_0296701 0 0 0
NC_0204381 0 0 0
NC_0143461 0 0 1									Species No. of Losses
NC_0297351 0 0 0									=================== ===================
Chlorophyceae 6 3 5									NC_0285861 0
NC_0083721 0 0 1									NC_0285841 0
Chaetophorales 0 0 0									NC_0204381 0
NC_0296711 0 0 0									NC_0296701 0
Sphaeropleales 0 0 5									Sphaeropleales 1
NC_0156451 0 0 1									NC_0081011 0
NC_0053531 0 0 0									Chaetophorales 0
NC_0285871 0 0 0									NC_0156451 0
NC_0285831 0 0 0									Chlorophyceae 1
NC_0285861 0 0 0									Chlamydomonadales 0
Chlamydomonadales 0 0 4									NC_0285871 0
NC_0110311 0 0 1									NC_0110311 0
NC_0081011 0 0 0									NC_0143461 0
									NC_0285831 0
Duplications: 6									NC_0053531 0
cDs: 3									NC_0083721 0
Losses: 18									NC_0296711 0
									NC_0297351 1
Leucine
COST: 29.0									Losses: 3
Duplication L. Bound U. Bound									Species Duplications cD_Nodes Losses
=================== =================== ====================									=================== ============== ============== ==============
n3357 Chlorophyceae N/A									NC_0285861 1 0 0
n3050 Chlorophyceae N/A									NC_0285841 1 0 0
n3026 Chlorophyceae N/A									NC_0204381 1 0 0
n3024 Chlorophyceae N/A									NC_0296701 1 0 0
n3022 Chlorophyceae N/A									Sphaeropleales 0 2 1
n3019 Chlorophyceae Chlorophyceae									NC_0081011 1 0 0
n3032 NC_0110311 Chlorophyceae									Chaetophorales 0 0 0
n3048 Chlorophyceae Chlorophyceae									NC_0156451 0 0 0
									Chlorophyceae 1 3 1
Duplications: 8									Chlamydomonadales 0 2 0
									NC_0285871 1 0 0
									NC_0110311 1 0 0
cD_Node L. Bound U. Bound									NC_0143461 0 0 0
=================== =================== ====================									NC_0285831 1 0 0
n3010 Chlorophyceae Chlorophyceae									NC_0053531 1 0 0
n3006 Sphaeropleales Sphaeropleales									NC_0083721 0 0 0
n3004 Sphaeropleales Sphaeropleales									NC_0296711 1 0 0
n3021 Chlorophyceae Chlorophyceae									NC_0297351 1 0 1
n3018 Chlamydomonadales Chlamydomonadales
n3035 Chlorophyceae Chlorophyceae									Duplications: 12
n3044 Chlamydomonadales Chlorophyceae									cDs: 7
n3042 Chlamydomonadales Chlorophyceae									Losses: 3
cDNodes: 8									Lysine
									COST: 13.5
Species No. of Losses
=================== ===================									Duplication L. Bound U. Bound
NC_0053531 0									=================== =================== ====================
NC_0204381 0									n3880 Chlorophyceae N/A
NC_0156451 1									n3699 Chlorophyceae N/A
Chlorophyceae 6									n3697 Chlorophyceae N/A
NC_0285841 0
Chlamydomonadales 4									Duplications: 3
Chaetophorales 0
NC_0285861 0
Sphaeropleales 4									cD_Node L. Bound U. Bound
NC_0143461 0									=================== =================== ====================
NC_0110311 0									n3717 Chlorophyceae N/A
NC_0296711 0									n3701 Chlorophyceae N/A
NC_0296701 0									n3713 Sphaeropleales Sphaeropleales
NC_0285831 0
NC_0285871 0									cDNodes: 3
NC_0297351 1
NC_0081011 0
NC_0083721 1									Species No. of Losses
									=================== ===================
Losses: 17									Chlamydomonadales 4
									NC_0296711 0
									NC_0296701 0
Species Duplications cD_Nodes Losses									NC_0053531 0
=================== ============== ============== ==============									NC_0143461 0
NC_0053531 0 0 0									NC_0285831 0
NC_0204381 0 0 0									NC_0156451 0
NC_0156451 0 0 1									NC_0083721 0
Chlorophyceae 7 3 6									Chlorophyceae 1
NC_0285841 0 0 0									Chaetophorales 0
Chlamydomonadales 0 3 4									Sphaeropleales 3
Chaetophorales 0 0 0									NC_0285861 0
NC_0285861 0 0 0									NC_0285841 0
Sphaeropleales 0 2 4									NC_0110311 0
NC_0143461 0 0 0									NC_0285871 0
NC_0110311 1 0 0									NC_0081011 0
NC_0296711 0 0 0									NC_0204381 0
NC_0296701 0 0 0									NC_0297351 1
NC_0285831 0 0 0
NC_0285871 0 0 0									Losses: 9
NC_0297351 0 0 1
NC_0081011 0 0 0
NC_0083721 0 0 1									Species Duplications cD_Nodes Losses
									=================== ============== ============== ==============
Duplications: 8									Chlamydomonadales 0 0 4
cDs: 8									NC_0296711 0 0 0
Losses: 17									NC_0296701 0 0 0
									NC_0053531 0 0 0
Methionine									NC_0143461 0 0 0
COST: 55.5									NC_0285831 0 0 0
									NC_0156451 0 0 0
									NC_0083721 0 0 0
Duplication L. Bound U. Bound									Chlorophyceae 3 2 1
=================== =================== ====================									Chaetophorales 0 0 0
n4651 Chlorophyceae N/A									Sphaeropleales 0 1 3
n4152 Chlorophyceae N/A									NC_0285861 0 0 0
n4096 Chlorophyceae N/A									NC_0285841 0 0 0
n4092 Chlorophyceae N/A									NC_0110311 0 0 0
n4090 Chlorophyceae N/A									NC_0285871 0 0 0
n4086 Chlorophyceae Chlorophyceae									NC_0081011 0 0 0
n4123 Chlorophyceae N/A									NC_0204381 0 0 0
n4118 Chlorophyceae N/A									NC_0297351 0 0 1
n4116 Chlorophyceae N/A
n4107 NC_0285871 Chlamydomonadales									Duplications: 3
n4148 Chlorophyceae N/A									cDs: 3
n4147 Chlorophyceae N/A									Losses: 9
n4146 Chlorophyceae N/A
n4144 Chlorophyceae N/A									Phenylalanine
n4142 Chlorophyceae N/A									COST: 17.0
Duplications: 15
									Duplication L. Bound U. Bound
									=================== =================== ====================
cD_Node L. Bound U. Bound									n5398 Chlorophyceae N/A
=================== =================== ====================									n5235 Chlorophyceae N/A
n4094 Chlorophyceae N/A									n5222 Chlorophyceae N/A
n4082 Chlorophyceae Chlorophyceae									n5233 Chlorophyceae Chlorophyceae
n4076 Chlamydomonadales Chlamydomonadales
n4074 Chlamydomonadales Chlamydomonadales									Duplications: 4
n4121 Chlorophyceae N/A
n4119 Chlorophyceae N/A
n4104 Sphaeropleales Sphaeropleales									cD_Node L. Bound U. Bound
n4113 Chlamydomonadales Chlamydomonadales									=================== =================== ====================
n4111 Chlamydomonadales Chlamydomonadales									n5223 Chlorophyceae N/A
n4150 Chlorophyceae N/A									n5215 Chlorophyceae N/A
n4149 Chlorophyceae N/A
n4134 Sphaeropleales Sphaeropleales									cDNodes: 2
cDNodes: 12
									Species No. of Losses
									=================== ===================
Species No. of Losses									NC_0156451 0
=================== ===================									NC_0285861 0
NC_0156451 2									NC_0083721 0
Chlamydomonadales 9									NC_0285841 0
NC_0081011 0									NC_0081011 0
NC_0143461 0									NC_0053531 0
NC_0083721 2									Chaetophorales 0
NC_0110311 0									NC_0143461 0
NC_0297351 0									NC_0296701 0
Chaetophorales 1									NC_0285871 0
NC_0053531 0									NC_0297351 0
NC_0285861 0									NC_0110311 0
NC_0296701 0									Chlorophyceae 2
NC_0204381 0									NC_0296711 0
NC_0296711 0									NC_0204381 0
NC_0285831 2									Chlamydomonadales 4
Sphaeropleales 12									NC_0285831 0
NC_0285871 0									Sphaeropleales 5
Chlorophyceae 5
NC_0285841 0									Losses: 11
Losses: 33
									Species Duplications cD_Nodes Losses
									=================== ============== ============== ==============
Species Duplications cD_Nodes Losses									NC_0156451 0 0 0
=================== ============== ============== ==============									NC_0285861 0 0 0
NC_0156451 0 0 2									NC_0083721 0 0 0
Chlamydomonadales 0 4 9									NC_0285841 0 0 0
NC_0081011 0 0 0									NC_0081011 0 0 0
NC_0143461 0 0 0									NC_0053531 0 0 0
NC_0083721 0 0 2									Chaetophorales 0 0 0
NC_0110311 0 0 0									NC_0143461 0 0 0
NC_0297351 0 0 0									NC_0296701 0 0 0
Chaetophorales 0 0 1									NC_0285871 0 0 0
NC_0053531 0 0 0									NC_0297351 0 0 0
NC_0285861 0 0 0									NC_0110311 0 0 0
NC_0296701 0 0 0									Chlorophyceae 4 2 2
NC_0204381 0 0 0									NC_0296711 0 0 0
NC_0296711 0 0 0									NC_0204381 0 0 0
NC_0285831 0 0 2									Chlamydomonadales 0 0 4
Sphaeropleales 0 2 12									NC_0285831 0 0 0
NC_0285871 1 0 0									Sphaeropleales 0 0 5
Chlorophyceae 14 6 5
NC_0285841 0 0 0									Duplications: 4
									cDs: 2
Duplications: 15									Losses: 11
cDs: 12
Losses: 33									Serine
									COST: 43.5
Proline
COST: 10.0
									Duplication L. Bound U. Bound
									=================== =================== ====================
Duplication L. Bound U. Bound									n6611 Chlorophyceae N/A
=================== =================== ====================									n6184 Chlorophyceae N/A
n5936 Chlorophyceae N/A									n6142 Chlorophyceae Chlorophyceae
n5767 Chlorophyceae Chlorophyceae									n6138 Chlorophyceae Chlorophyceae
									n6130 Chlorophyceae Chlorophyceae
Duplications: 2									n6126 Chlorophyceae Chlorophyceae
									n6120 Chlorophyceae Chlorophyceae
									n6119 NC_0296701 Sphaeropleales
cD_Node L. Bound U. Bound									n6123 NC_0296711 Sphaeropleales
=================== =================== ====================									n6129 NC_0081011 Sphaeropleales
n5755 Chlamydomonadales Chlorophyceae									n6133 NC_0156451 Chaetophorales
n5753 Chlamydomonadales Chlorophyceae									n6182 Chlorophyceae N/A
n5751 Chlamydomonadales Chlorophyceae									n6152 Chlorophyceae Chlorophyceae
n5762 Sphaeropleales Sphaeropleales
n5771 Chlorophyceae Chlorophyceae									Duplications: 13
n5769 Chlorophyceae Chlorophyceae
cDNodes: 6									cD_Node L. Bound U. Bound
									=================== =================== ====================
									n6154 Chlorophyceae Chlorophyceae
Species No. of Losses									n6181 Chlorophyceae N/A
=================== ===================									n6179 Chlorophyceae N/A
NC_0297351 0									n6177 Chlorophyceae N/A
NC_0053531 0									n6166 Chlamydomonadales Chlorophyceae
NC_0081011 0									n6164 Chlamydomonadales Chlorophyceae
NC_0296701 0									n6175 Sphaeropleales Chlorophyceae
NC_0285871 0									n6173 Sphaeropleales Chlorophyceae
NC_0285861 0									n6171 Sphaeropleales Chlorophyceae
NC_0285831 0
NC_0083721 1									cDNodes: 9
Chaetophorales 0
NC_0156451 1
Chlorophyceae 1									Species No. of Losses
NC_0143461 0									=================== ===================
NC_0296711 1									NC_0285831 0
Sphaeropleales 1									NC_0156451 1
NC_0110311 1									NC_0285861 0
NC_0204381 0									Chlorophyceae 5
Chlamydomonadales 1									Chlamydomonadales 6
NC_0285841 0									NC_0296701 0
									NC_0083721 1
Losses: 7									NC_0285841 0
									NC_0110311 2
									NC_0285871 0
Species Duplications cD_Nodes Losses									Chaetophorales 1
=================== ============== ============== ==============									NC_0053531 0
NC_0297351 0 0 0									NC_0296711 0
NC_0053531 0 0 0									NC_0297351 0
NC_0081011 0 0 0									Sphaeropleales 7
NC_0296701 0 0 0									NC_0143461 1
NC_0285871 0 0 0									NC_0081011 0
NC_0285861 0 0 0									NC_0204381 0
NC_0285831 0 0 0
NC_0083721 0 0 1									Losses: 24
Chaetophorales 0 0 0
NC_0156451 0 0 1
Chlorophyceae 2 2 1									Species Duplications cD_Nodes Losses
NC_0143461 0 0 0									=================== ============== ============== ==============
NC_0296711 0 0 1									NC_0285831 0 0 0
Sphaeropleales 0 1 1									NC_0156451 1 0 1
NC_0110311 0 0 1									NC_0285861 0 0 0
NC_0204381 0 0 0									Chlorophyceae 9 4 5
Chlamydomonadales 0 3 1									Chlamydomonadales 0 2 6
NC_0285841 0 0 0									NC_0296701 1 0 0
									NC_0083721 0 0 1
Duplications: 2									NC_0285841 0 0 0
cDs: 6									NC_0110311 0 0 2
Losses: 7									NC_0285871 0 0 0
									Chaetophorales 0 0 1
Threonine									NC_0053531 0 0 0
COST: 21.5									NC_0296711 1 0 0
									NC_0297351 0 0 0
									Sphaeropleales 0 3 7
Duplication L. Bound U. Bound									NC_0143461 0 0 1
=================== =================== ====================									NC_0081011 1 0 0
n7270 Chlorophyceae N/A									NC_0204381 0 0 0
n7095 Chlorophyceae N/A
n7085 Chlorophyceae Chlorophyceae									Duplications: 13
n7083 Chlorophyceae Chlorophyceae									cDs: 9
n7079 Chlorophyceae Chlorophyceae									Losses: 24
Duplications: 5									Tryptophan
									COST: 10.0
cD_Node L. Bound U. Bound
=================== =================== ====================									Duplication L. Bound U. Bound
n7071 Sphaeropleales Sphaeropleales									=================== =================== ====================
n7090 Chlorophyceae Chlorophyceae									n7687 Chlorophyceae N/A
									n7518 Chlorophyceae N/A
cDNodes: 2
									Duplications: 2
Species No. of Losses
=================== ===================									cD_Node L. Bound U. Bound
NC_0083721 1									=================== =================== ====================
NC_0285871 0									n7524 Chlorophyceae N/A
NC_0285841 0									n7506 Chlamydomonadales Chlorophyceae
Chaetophorales 0									n7502 Chlamydomonadales Chlorophyceae
NC_0143461 1									n7515 Sphaeropleales Sphaeropleales
Chlamydomonadales 5									n7513 Sphaeropleales Sphaeropleales
NC_0297351 0
NC_0296701 0									cDNodes: 5
Chlorophyceae 5
NC_0156451 0
NC_0053531 0									Species No. of Losses
NC_0285831 0									=================== ===================
NC_0296711 0									NC_0285841 0
NC_0204381 0									NC_0204381 0
NC_0285861 0									NC_0285861 1
NC_0081011 0									NC_0297351 0
Sphaeropleales 2									NC_0296701 0
NC_0110311 0									Chlorophyceae 1
									NC_0285871 0
Losses: 14									NC_0053531 0
									NC_0156451 1
									NC_0083721 1
Species Duplications cD_Nodes Losses									Chlamydomonadales 1
=================== ============== ============== ==============									NC_0143461 0
NC_0083721 0 0 1									NC_0110311 0
NC_0285871 0 0 0									NC_0285831 0
NC_0285841 0 0 0									NC_0296711 0
Chaetophorales 0 0 0									Chaetophorales 1
NC_0143461 0 0 1									NC_0081011 0
Chlamydomonadales 0 0 5									Sphaeropleales 1
NC_0297351 0 0 0
NC_0296701 0 0 0									Losses: 7
Chlorophyceae 5 1 5
NC_0156451 0 0 0
NC_0053531 0 0 0									Species Duplications cD_Nodes Losses
NC_0285831 0 0 0									=================== ============== ============== ==============
NC_0296711 0 0 0									NC_0285841 0 0 0
NC_0204381 0 0 0									NC_0204381 0 0 0
NC_0285861 0 0 0									NC_0285861 0 0 1
NC_0081011 0 0 0									NC_0297351 0 0 0
Sphaeropleales 0 1 2									NC_0296701 0 0 0
NC_0110311 0 0 0									Chlorophyceae 2 1 1
									NC_0285871 0 0 0
Duplications: 5									NC_0053531 0 0 0
cDs: 2									NC_0156451 0 0 1
Losses: 14									NC_0083721 0 0 1
									Chlamydomonadales 0 2 1
Tyrosine									NC_0143461 0 0 0
COST: 24.0									NC_0110311 0 0 0
									NC_0285831 0 0 0
									NC_0296711 0 0 0
Duplication L. Bound U. Bound									Chaetophorales 0 0 1
=================== =================== ====================									NC_0081011 0 0 0
n8054 Chlorophyceae N/A									Sphaeropleales 0 2 1
n7883 Chlorophyceae N/A
n7881 Chlorophyceae N/A									Duplications: 2
n7879 Chlorophyceae N/A									cDs: 5
n7873 Chlorophyceae N/A									Losses: 7
n7869 Chlorophyceae N/A
									Valine
Duplications: 6									COST: 20.5
cD_Node L. Bound U. Bound									Duplication L. Bound U. Bound
=================== =================== ====================									=================== =================== ====================
n7891 Chlorophyceae N/A									n8306 Chlorophyceae N/A
n7887 Chlorophyceae N/A									n8302 Chlorophyceae N/A
									n8300 Chlorophyceae N/A
cDNodes: 2									n8288 Chlorophyceae N/A
									n8284 Chlorophyceae Chlorophyceae
Species No. of Losses									Duplications: 5
=================== ===================
NC_0156451 1
NC_0083721 1									cD_Node L. Bound U. Bound
NC_0297351 0									=================== =================== ====================
NC_0143461 0									n8469 Chlorophyceae N/A
Sphaeropleales 6									n8298 Chlorophyceae N/A
NC_0081011 0									n8297 Chlamydomonadales N/A
Chaetophorales 0									n8295 Chlamydomonadales N/A
NC_0285831 0									n8293 Chlamydomonadales N/A
NC_0110311 0
NC_0053531 0									cDNodes: 5
Chlorophyceae 1
NC_0204381 0
NC_0285871 0									Species No. of Losses
NC_0296711 0									=================== ===================
NC_0285841 0									NC_0285871 0
NC_0296701 0									NC_0081011 0
Chlamydomonadales 6									NC_0285861 0
NC_0285861 0									NC_0083721 1
									NC_0143461 0
Losses: 15									Chlamydomonadales 0
									Chlorophyceae 3
									NC_0296701 0
Species Duplications cD_Nodes Losses									NC_0156451 1
=================== ============== ============== ==============									NC_0296711 0
NC_0156451 0 0 1									NC_0285841 0
NC_0083721 0 0 1									NC_0053531 0
NC_0297351 0 0 0									Chaetophorales 1
NC_0143461 0 0 0									Sphaeropleales 5
Sphaeropleales 0 0 6									NC_0297351 0
NC_0081011 0 0 0									NC_0285831 0
Chaetophorales 0 0 0									NC_0204381 0
NC_0285831 0 0 0									NC_0110311 2
NC_0110311 0 0 0
NC_0053531 0 0 0									Losses: 13
Chlorophyceae 6 2 1
NC_0204381 0 0 0
NC_0285871 0 0 0									Species Duplications cD_Nodes Losses
NC_0296711 0 0 0									=================== ============== ============== ==============
NC_0285841 0 0 0									NC_0285871 0 0 0
NC_0296701 0 0 0									NC_0081011 0 0 0
Chlamydomonadales 0 0 6									NC_0285861 0 0 0
NC_0285861 0 0 0									NC_0083721 0 0 1
									NC_0143461 0 0 0
Duplications: 6									Chlamydomonadales 0 3 0
cDs: 2									Chlorophyceae 5 2 3
Losses: 15									NC_0296701 0 0 0
									NC_0156451 0 0 1
									NC_0296711 0 0 0
									NC_0285841 0 0 0
									NC_0053531 0 0 0
									Chaetophorales 0 0 1
									Sphaeropleales 0 0 5
									NC_0297351 0 0 0
									NC_0285831 0 0 0
									NC_0204381 0 0 0
									NC_0110311 0 0 2
									Duplications: 5
									cDs: 5
									Losses: 13
